# Supplementary material for: Sampling Strategy and Potential Utility of Indels for DNA Barcoding of Closely Related Plant Species: A Case Study in Taxus
Source: PubMed Central journal article supplement (PMC3430262; doi:10.3390/ijms13078740), 2012-07-13
Supplement: ijms-13-08740-s001.pdf [file ijms-13-08740-s001.pdf]

# Sampling Strategy and Potential Utility of Indels for DNA Barcoding of Closely Related Plant Species: A Case Study in *Taxus*

## Supplementary Information

**Table S1.** List of *Taxus* samples included in this study, voucher information, GenBank accession numbers, and herbarium acronym.

| Lineage              | Sample code     | <i>matK</i>     | <i>trnL-trnF</i> | <i>trnH-psbA</i> | ITS             | Voucher specimen | Herbarium |
|----------------------|-----------------|-----------------|------------------|------------------|-----------------|------------------|-----------|
| Hengduan type        | BM10            | HM590987        | HM591124         | HM591078         | HM590944        | GM-24171         | KUN/E     |
|                      | BM25            | <b>JX174662</b> | <b>JX188601</b>  | <b>JX188478</b>  | <b>JX188542</b> | GM-24186         | KUN/E     |
|                      | LG1             | <b>JX174663</b> | <b>JX188602</b>  | <b>JX188479</b>  | <b>JX188543</b> | GM-24192         | KUN/E     |
|                      | LG15            | HM590988        | HM591125         | HM591079         | HM590945        | GM-24201         | KUN/E     |
|                      | LG25            | <b>JX174664</b> | <b>JX188603</b>  | <b>JX188480</b>  | <b>JX188544</b> | GM-24216         | KUN/E     |
|                      | LJ2             | <b>JX174665</b> | EU052221         | <b>JX188481</b>  | <b>JX188545</b> | GM-2433          | KUN/E     |
|                      | LJ10            | HM590986        | HM591123         | HM591077         | HM590943        | GM-2441          | KUN/E     |
|                      | LJ25            | <b>JX174666</b> | <b>JX188604</b>  | <b>JX188482</b>  | <b>JX188546</b> | GM-2456          | KUN/E     |
|                      | YY1             | <b>JX174667</b> | <b>JX188605</b>  | <b>JX188483</b>  | <b>JX188547</b> | GF-040911-29-1   | KUN       |
|                      | YY5             | HM590989        | HM591126         | HM591080         | HM590946        | GF-040911-29-5   | KUN       |
| YY10                 | <b>JX174668</b> | <b>JX188606</b> | <b>JX188484</b>  | <b>JX188548</b>  | GF-040911-29-10 | KUN              |           |
| Qinling type         | HL1             | <b>JX174669</b> | <b>JX188607</b>  | <b>JX188485</b>  | <b>JX188549</b> | LJ-05-1024       | KUN/E     |
|                      | HL13            | HM591005        | HM591142         | HM591096         | HM590962        | LJ-05-1024       | KUN/E     |
|                      | HL29            | <b>JX174670</b> | <b>JX188608</b>  | <b>JX188486</b>  | <b>JX188550</b> | LJ-05-1052       | KUN/E     |
|                      | SL3             | <b>JX174672</b> | <b>JX188610</b>  | <b>JX188488</b>  | <b>JX188552</b> | LJ-05-1055       | KUN/E     |
|                      | SL10            | HM591006        | HM591143         | HM591097         | HM590963        | LJ-05-1062       | KUN/E     |
|                      | SL24            | <b>JX174671</b> | <b>JX188609</b>  | <b>JX188487</b>  | <b>JX188551</b> | LJ-05-1076       | KUN/E     |
|                      | TB1             | <b>JX174673</b> | <b>JX188611</b>  | <b>JX188489</b>  | <b>JX188553</b> | MMO 05-677       | KUN/E     |
|                      | TB4             | <b>JX174674</b> | <b>JX188612</b>  | <b>JX188490</b>  | <b>JX188554</b> | MMO 05-680       | KUN/E     |
| TB14                 | HM591004        | HM591141        | HM591095         | HM590961         | MMO 05-694      | KUN/E            |           |
| <i>Taxus baccata</i> | Bat1            | HM591019        | EF680264         | HM591113         | EF680244        | Fior S 1         | E         |
|                      | Bat11           | <b>JX174675</b> | <b>JX188613</b>  | <b>JX188491</b>  | <b>JX188555</b> | Fior S 11        | E         |
|                      | Bat21           | <b>JX174676</b> | <b>JX188614</b>  | <b>JX188492</b>  | <b>JX188556</b> | Fior S 21        | E         |
|                      | EU1             | <b>JX174677</b> | <b>JX188615</b>  | <b>JX188493</b>  | <b>JX188557</b> | 20010206A        | E         |
|                      | EU2             | HM591017        | EF680268         | HM591111         | EF680248        | Aberlady4        | E         |
|                      | EU3             | <b>JX174678</b> | EF680267         | <b>JX188494</b>  | EF680247        | AA-442-91        | E         |
|                      | IR1             | <b>JX174679</b> | <b>JX188616</b>  | <b>JX188495</b>  | <b>JX188558</b> | M. Zarrei-476    | E         |
|                      | IR2             | HM591021        | HM591155         | HM591115         | HM590977        | M. Zarrei-477    | E         |
|                      | IR3             | <b>JX174680</b> | EF680269         | <b>JX188496</b>  | EF680249        | M. Zarrei-478    | E         |
|                      | PO5             | <b>JX174682</b> | EF680265         | <b>JX188498</b>  | EF680245        | Moncao-5         | E         |
|                      | PO15            | HM591018        | HM591154         | HM591112         | HM590976        | Moncao-15        | E         |
|                      | PO25            | <b>JX174681</b> | <b>JX188617</b>  | <b>JX188497</b>  | <b>JX188559</b> | Moncao-25        | E         |

|                       |       |                 |                 |                 |                 |                 |       |
|-----------------------|-------|-----------------|-----------------|-----------------|-----------------|-----------------|-------|
|                       | TU8   | HM591020        | EF680266        | HM591114        | EF680246        | AAD 11812-8     | E     |
|                       | TU24  | <b>JX174683</b> | <b>JX188618</b> | <b>JX188499</b> | <b>JX188560</b> | AAD 12043-3     | E     |
| <i>T. chinensis</i>   | CG2   | HM590991        | HM591128        | HM591082        | HM590948        | MMO 05-597      | KUN/E |
|                       | CG24  | <b>JX174684</b> | <b>JX188619</b> | <b>JX188500</b> | <b>JX188561</b> | MMO 05-624      | KUN/E |
|                       | CG27  | <b>JX174685</b> | <b>JX188620</b> | <b>JX188501</b> | <b>JX188562</b> | MMO 05-627      | KUN/E |
|                       | SN1   | <b>JX174686</b> | <b>JX188621</b> | <b>JX188502</b> | <b>JX188563</b> | MMO 05-488      | KUN/E |
|                       | SN5   | <b>JX174687</b> | <b>JX188622</b> | <b>JX188503</b> | <b>JX188564</b> | MMO 05-504      | KUN/E |
|                       | SN8   | HM590992        | HM591129        | HM591083        | HM590949        | MMO 05-507      | KUN/E |
|                       | SP4   | <b>JX174688</b> | <b>JX188623</b> | <b>JX188504</b> | <b>JX188565</b> | LJ-05-996       | KUN/E |
|                       | SP7   | <b>JX174689</b> | <b>JX188624</b> | <b>JX188505</b> | <b>JX188566</b> | LJ-05-999       | KUN/E |
|                       | SP21  | HM590990        | HM591127        | HM591081        | HM590947        | LJ-05-999       | KUN/E |
| <i>T. cuspidata</i>   | JL34  | <b>JX174690</b> | <b>JX188625</b> | <b>JX188506</b> | <b>JX188567</b> | LJM-34          | KUN/E |
|                       | JL48  | HM591009        | HM591147        | HM591103        | HM590969        | LJM-48          | KUN/E |
|                       | JP1   | <b>JX174691</b> | <b>JX188626</b> | <b>JX188507</b> | <b>JX188568</b> |                 | KUN   |
|                       | JP13  | HM591011        | HM591149        | HM591105        | HM590971        | Kokubugata-6972 | KUN   |
|                       | K10   | <b>JX174692</b> | <b>JX188627</b> | <b>JX188508</b> | <b>JX188569</b> | WLS-10          | KUN   |
|                       | K19   | HM591010        | HM591148        | HM591104        | HM590970        | WLS-19          | KUN   |
| <i>T. fuana</i>       | GL15  | HM591016        | HM591153        | HM591110        | HM590975        | GLM-081628      | KUN   |
|                       | GL19  | <b>JX174693</b> | <b>JX188628</b> | <b>JX188509</b> | <b>JX188570</b> | GLM-081632      | KUN   |
|                       | GL26  | <b>JX174694</b> | <b>JX188629</b> | <b>JX188510</b> | <b>JX188571</b> | GLM-081639      | KUN   |
|                       | IN70  | <b>JX174695</b> | <b>JX188630</b> | <b>JX188511</b> | <b>JX188572</b> | Yuhy-70         | KUN   |
|                       | IN74  | HM591015        | HM591152        | HM591109        | HM590974        | Yuhy-74         | KUN   |
|                       | IN87  | <b>JX174696</b> | <b>JX188631</b> | <b>JX188512</b> | <b>JX188573</b> | Yuhy-84         | KUN   |
|                       | KD15  | HM591014        | HM591151        | HM591108        | HM590973        | Amin-25102      | KUN   |
|                       | KN8   | <b>JX174697</b> | <b>JX188632</b> | <b>JX188513</b> | <b>JX188574</b> | Amin-25068      | KUN   |
|                       | KV18  | HM591012        | EF680261        | HM591106        | EF680241        | Amin-25332      | KUN   |
|                       | SW4   | <b>JX174699</b> | <b>JX188633</b> | <b>JX188515</b> | <b>JX188575</b> | Amin-25229      | KUN   |
|                       | SW12  | <b>JX174698</b> | EF680260        | <b>JX188514</b> | EF680240        | Amin-25237      | KUN   |
|                       | SW19  | HM591013        | HM591150        | HM591107        | HM590972        | Amin-25244      | KUN   |
| <i>T. mairei</i>      | FQ1   | <b>JX174700</b> | <b>JX188634</b> | <b>JX188516</b> | <b>JX188576</b> | ZHXM0506141     | KUN   |
|                       | FQ12  | HM591002        | HM591139        | HM591093        | HM590959        | ZHXM0506152     | KUN   |
|                       | FQ28  | <b>JX174701</b> | <b>JX188635</b> | <b>JX188517</b> | <b>JX188577</b> | ZHXM0506168     | KUN   |
|                       | GJ12  | HM591001        | HM591138        | HM591092        | HM590958        | GLM-05971       | KUN   |
|                       | GJ21  | <b>JX174702</b> | <b>JX188636</b> | <b>JX188518</b> | <b>JX188578</b> | GLM 05-980      | KUN   |
|                       | GJ30  | <b>JX174703</b> | <b>JX188637</b> | <b>JX188519</b> | <b>JX188579</b> | GLM 05-989      | KUN   |
|                       | LA1   | HM591003        | HM591140        | HM591094        | HM590960        | ZHXM050691      | KUN   |
|                       | LA4   | <b>JX174705</b> | EU052228        | <b>JX188521</b> | <b>JX188581</b> | ZHXM050694      | KUN   |
|                       | LA16  | <b>JX174704</b> | <b>JX188638</b> | <b>JX188520</b> | <b>JX188580</b> | ZHXM0506106     | KUN   |
|                       | LCH10 | HM591000        | HM591137        | HM591091        | HM590957        | Zeng7-10        | KUN   |
|                       | LCH28 | <b>JX174706</b> | <b>JX188639</b> | <b>JX188522</b> | <b>JX188582</b> | Zeng7-28        | KUN   |
|                       | WX10  | HM590999        | HM591136        | HM591090        | HM590956        | GLM-07623       | KUN   |
| <i>T. wallichiana</i> | CN2   | <b>JX174708</b> | <b>JX188641</b> | <b>JX188524</b> | <b>JX188584</b> | GLM-081810      | KUN   |

|             |                 |                 |                 |                 |                 |           |       |
|-------------|-----------------|-----------------|-----------------|-----------------|-----------------|-----------|-------|
| CN11        | <b>JX174707</b> | <b>JX188640</b> | <b>JX188523</b> | <b>JX188583</b> | GLM-081819      | KUN       |       |
| CN20        | HM590984        | HM591121        | HM591075        | HM590941        | GLM-081828      | KUN       |       |
| CY13        | <b>JX174709</b> | <b>JX188642</b> | <b>JX188525</b> | <b>JX188585</b> | GLM-082139      | KUN       |       |
| CY23        | HM590978        | HM591116        | HM591069        | HM590936        | GLM-2149        | KUN       |       |
| CY33        | <b>JX174710</b> | <b>JX188643</b> | <b>JX188526</b> | <b>JX188586</b> | GLM-082159      | KUN       |       |
| GS1         | HM590982        | EF680273        | HM591073        | EF680253        | GLM-2301        | KUN       |       |
| GS20        | <b>JX174711</b> | EU052219        | <b>JX188527</b> | <b>JX188587</b> | GLM-2334        | KUN       |       |
| JD1         | HM590980        | HM591118        | HM591071        | HM590938        | GM-24222        | KUN       |       |
| JD7         | <b>JX174713</b> | EU052218        | <b>JX188529</b> | <b>JX188588</b> | GM-24228        | KUN       |       |
| JD22        | <b>JX174712</b> | EU052217        | <b>JX188528</b> | <b>JX188589</b> | GM-24243        | KUN       |       |
| JZ8         | HM590981        | HM591119        | HM591072        | HM590939        | LiuJ-09228      | KUN       |       |
| JZ9         | <b>JX174714</b> | <b>JX188644</b> | <b>JX188530</b> | <b>JX188590</b> | LiuJ-09229      | KUN       |       |
| MA1         | HM590979        | HM591117        | HM591070        | HM590937        | GLM-06257       | KUN/E     |       |
| MA5         | <b>JX174715</b> | <b>JX188645</b> | <b>JX188531</b> | <b>JX188591</b> | GLM-06261       | KUN/E     |       |
| MA8         | <b>JX174716</b> | <b>JX188646</b> | <b>JX188532</b> | <b>JX188592</b> | GLM-06314       | KUN/E     |       |
| ND4         | HM590985        | HM591122        | HM591076        | HM590942        | NEP001-0364     | E         |       |
| ND14        | <b>JX174717</b> | EF680275        | <b>JX188533</b> | EF680255        | NEP014          | E         |       |
| ND28        | <b>JX174718</b> | <b>JX188647</b> | <b>JX188534</b> | <b>JX188593</b> | NEP028          | E         |       |
| XL5         | HM590983        | HM591120        | HM591074        | HM590940        | LJ-07035        | KUN       |       |
| XL12        | <b>JX174719</b> | <b>JX188648</b> | <b>JX188535</b> | <b>JX188594</b> | LJ-07042        | KUN       |       |
| XL23        | <b>JX174720</b> | <b>JX188649</b> | <b>JX188536</b> | <b>JX188595</b> | LJ-07053        | KUN       |       |
| Tonkin type | AL1             | HM590998        | HM591135        | HM591087        | HM590953        | GLM-06001 | KUN   |
|             | AL2             | <b>JX174721</b> | <b>JX188650</b> | <b>JX188537</b> | <b>JX188596</b> | GLM-06002 | KUN/E |
|             | AL3             | <b>JX174722</b> | <b>JX188651</b> | <b>JX188538</b> | <b>JX188597</b> | GLM-06003 | KUN/E |
|             | NV1             | HM590997        | HM591133        | HM591089        | HM590955        | NVSDE82   | KUN/E |
|             | NV8             | <b>JX174723</b> | <b>JX188652</b> | <b>JX188539</b> | <b>JX188598</b> | NVSDE95   | KUN/E |
|             | SC1             | HM590996        | HM591134        | HM591088        | HM590954        | GLM-2357  | KUN/E |
|             | SC17            | <b>JX174724</b> | <b>JX188653</b> | <b>JX188540</b> | <b>JX188599</b> | GLM-2376  | KUN/E |
|             | SC23            | <b>JX174725</b> | EU052214        | <b>JX188541</b> | <b>JX188600</b> | GLM-2382  | KUN/E |

Note, their lineages names, locality are same to Liu *et al.* [29].

**Table S2.** Mean within population distance for four regions studied in present work.

| Population code | Regions     |                  |                  |         |
|-----------------|-------------|------------------|------------------|---------|
|                 | <i>matK</i> | <i>trnL-trnF</i> | <i>trnH-psbA</i> | ITS     |
| LG              | 0.00000     | 0.00000          | 0.00000          | 0.00000 |
| YY              | 0.00000     | 0.00000          | 0.00000          | 0.00000 |
| LJ              | 0.00000     | 0.00000          | 0.00000          | 0.00059 |
| BM              | 0.00000     | 0.00000          | 0.00000          | 0.00088 |
| HL              | 0.00000     | 0.00000          | 0.00125          | 0.00000 |
| SL              | 0.00000     | 0.00000          | 0.00125          | 0.00000 |
| TB              | 0.00000     | 0.00000          | 0.00125          | 0.00000 |
| BAT             | 0.00000     | 0.00000          | 0.00000          | 0.00000 |
| EU              | 0.00000     | 0.00082          | 0.00000          | 0.00000 |

|     |         |         |         |         |
|-----|---------|---------|---------|---------|
| IR  | 0.00000 | 0.00082 | 0.00000 | 0.00234 |
| PO  | 0.00000 | 0.00000 | 0.00000 | 0.00000 |
| TU  | 0.00000 | 0.00000 | 0.00000 | 0.00000 |
| CG  | 0.00000 | 0.00000 | 0.00000 | 0.00059 |
| SN  | 0.00000 | 0.00000 | 0.00000 | 0.00000 |
| SP  | 0.00000 | 0.00000 | 0.00000 | 0.00410 |
| JL  | 0.00000 | 0.00000 | 0.00000 | 0.00000 |
| JP  | 0.00000 | 0.00000 | 0.00000 | 0.00000 |
| K   | 0.00000 | 0.00000 | 0.00000 | 0.00000 |
| GL  | 0.00043 | 0.00000 | 0.00251 | 0.00000 |
| IN  | 0.00000 | 0.00000 | 0.00000 | 0.00000 |
| KD  | 0.00000 | 0.00000 | 0.00188 | 0.00000 |
| SW  | 0.00000 | 0.00166 | 0.00000 | 0.00000 |
| FQ  | 0.00000 | 0.00000 | 0.00000 | 0.00147 |
| GJ  | 0.00000 | 0.00082 | 0.00000 | 0.00059 |
| LA  | 0.00000 | 0.00083 | 0.00000 | 0.00000 |
| LCH | 0.00000 | 0.00123 | 0.00000 | 0.00088 |
| AL  | 0.00000 | 0.00000 | 0.00000 | 0.00000 |
| NV  | 0.00000 | 0.00000 | 0.00000 | 0.00000 |
| SC  | 0.00000 | 0.00000 | 0.00000 | 0.00000 |
| CN  | 0.00000 | 0.00081 | 0.00000 | 0.00029 |
| CY  | 0.00000 | 0.00000 | 0.00242 | 0.00059 |
| GS  | 0.00000 | 0.00000 | 0.00121 | 0.00000 |
| JD  | 0.00000 | 0.00163 | 0.00000 | 0.00000 |
| JZ  | 0.00000 | 0.00000 | 0.00000 | 0.00000 |
| MA  | 0.00000 | 0.00080 | 0.00000 | 0.00000 |
| ND  | 0.00000 | 0.00081 | 0.00260 | 0.00000 |
| XL  | 0.00000 | 0.00082 | 0.00000 | 0.00059 |
| WX  | NC      | NC      | NC      | NC      |
| KV  | NC      | NC      | NC      | NC      |

---

Note: n.c., not calculated.

© 2012 by the authors; licensee MDPI, Basel, Switzerland. This article is an open access article distributed under the terms and conditions of the Creative Commons Attribution license (<http://creativecommons.org/licenses/by/3.0/>).
